# Supplementary material for: Physiological and Comparative Proteomic Analyses Provide Insight Into the Differential Responses of Acanthus Ilicifolius and Its Relative, Acanthus Mollis, to Tidal Flooding Stress
Source: Preprints.org preprint supplement (doi:10.20944/preprints202012.0169.v1), 2020-12-07
Supplement: Supplementary file 1 [file Supplementary Figure 1-3.docx]

**Supplementary**


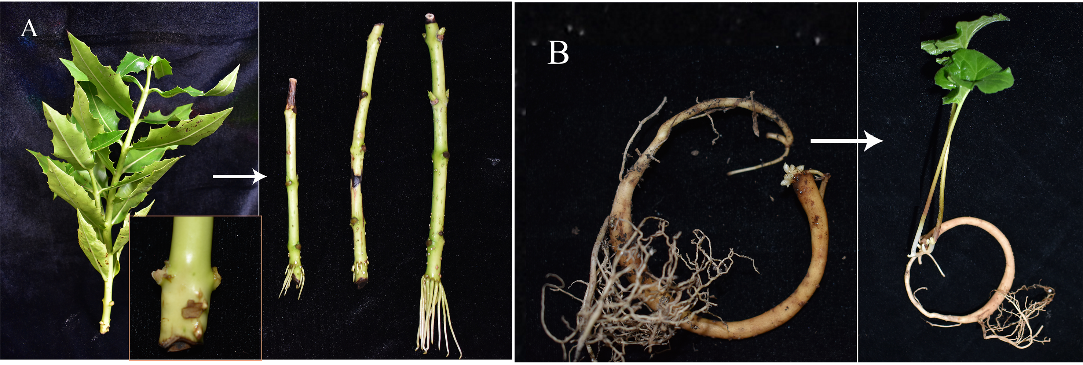


Supplementary Fig. S1. The asexual reproduction of (A) *A. ilicifolius* and (B) *A. mollis*.


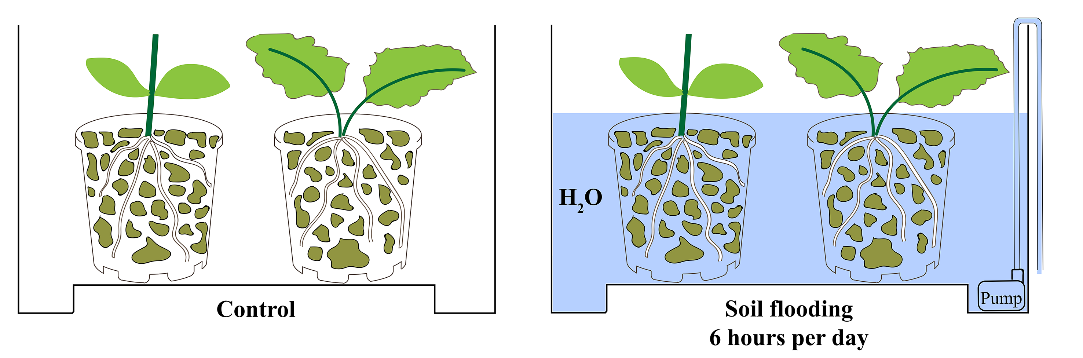


Supplementary Fig. S2. Diagram illustrating experimental set up.


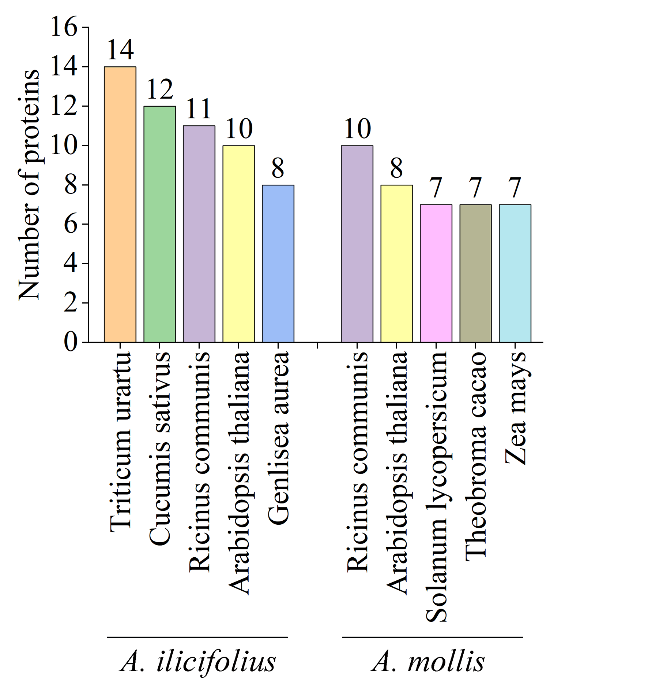


Supplementary Fig. S3. Top-five species that has high homology with the identiﬁed protein in the tissues of *A. ilicifolius* and *A. mollis*.
