# Supplementary material for: Physiological and Comparative Proteomic Analyses Provide Insight Into the Differential Responses of Acanthus Ilicifolius and Its Relative, Acanthus Mollis, to Tidal Flooding Stress
Source: Preprints.org preprint supplement (doi:10.20944/preprints202012.0169.v1), 2020-12-07
Supplement: Supplementary file 3 [file Supplementary Table S1.docx]

**Supplementary Table S1.** Sequences of forward and reverse primers used in qPCR for gene expression analysis in *A. ilicifolius* and *A. mollis*.

| **Species** | **Gene name** | **Annealing temperature** | **Forward primer sequence (5’ to 3’)** |
| --- | --- | --- | --- |
| *A. ilicifolius* | 14-3-3 protein | 61℃ | F: GCAGCTCAGCATTAGCAATATC |
| 61℃ | R: TCGCTACTTGGCGGAATTTA |
|  | Heat shock protein | 61℃ | F: AAGCGGAGTCTGTTGTGTATC |
|  | 61℃ | R: CACCAGCAAGCGAGTCTTTA |
|  | S-adenosylmethionine synthase | 61℃ | F: GCACCACCATCATTCTTGTATTC |
|  | 61℃ | R: GTGCCAAGCTCACTCAAGTA |
|  | ATP synthase | 61℃ | F: AACAGACCATCTCACGTCTAATC |
|  | 61℃ | R: GATCCTGCACACGACTCTATTC |
|  | Enolase | 61℃ | F: TGTAGGGAACAATCTGGCTATG |
|  | 61℃ | R: AACTGCTCGGACCTTTACTG |
|  | Malate dehydrogenase | 61℃ | F: GCCCTGTGAAATCGGATACTT |
|  | 61℃ | R: GTCTCTGAGCTGAGCCTTTATG |
|  | Glyceraldehyde-3-phosphate dehydrogenase | 61℃ | F: GTACCAAGCAACAAGCTTCAC |
|  | 61℃ | R: GATGTCGTCTCCACCGATTT |
|  | Phosphoglycerate kinase | 61℃ | F: TTGCCAGTGCCATTTCATATTC |
|  | 61℃ | R: TCAAGGCTCACATCCACATC |
|  | Phosphoglycolate phosphatase | 61℃ | F: GCATAAGTGTATCCTTCATGTTTGA |
|  | 61℃ | R: GCATCTTACAATCACAACCAACT |
|  | Actin | 61℃ | F: CTCACTCCATCACCAGAATCAA |
|  | 61℃ | R: CTTCAATGTCCCAGCAATGTATG |
|  |  |  |  |
| *A. mollis* | 14-3-3 protein | 61℃ | F: CAACCTCCTCTCTGTTGCTTAC |
| 61℃ | R: GCTCTCCTCCTTATGCTCAATG |
|  | Heat shock protein | 61℃ | F: TAGTTCCCTCCTCTTCCTTCTT |
|  | 61℃ | R: CACTCCGAGTTCATCAGTTACC |
|  | Triosephosphate isomerase | 61℃ | F: GCAACATCTGCTGACACATTC |
|  | 61℃ | R: TGGGCTATTGGAACTGGTAAAG |
|  | 2-Cys peroxiredoxin | 61℃ | F: TTTGAGGCAGAGGCTGTTT |
|  | 61℃ | R: CGAAGGTGAAATCCAGAGGATAG |
|  | Succinyl-CoA ligase | 61℃ | F: CCTCGGTTACTGGAGTATCAAC |
|  | 61℃ | R: GGGAATACCAGGGTGCATATAA |
|  | Malate dehydrogenase | 61℃ | F: GCAACATCTGCTGACACATTC |
|  | 61℃ | R: TGGGCTATTGGAACTGGTAAAG |
|  | Glyceraldehyde-3-phosphate dehydrogenase | 61℃ | F: CAGTCAGATCCACCACAGATAC |
|  | 61℃ | R: GGTGATAGGCTGTTGGGAAA |
|  | Phosphoglycerate kinase | 61℃ | F: GCAATCCTGCCACCAATTTC |
|  | 61℃ | R: ACTACTCCTGCCTCTGTTCT |
|  | Fructose-bisphosphate aldolase | 61℃ | F: CATGGACCCTTTCGTTCTCTT |
|  | 61℃ | R: CTTCTTCACGTTCTCCTCCTTAC |
|  | Actin | 61℃ | F: GACAGATCATGGGCCTCTTT |
|  | 61℃ | R: ATCTTCTGCTTCTGCCATCTT |
