# Supplementary material for: Physiological and Comparative Proteomic Analyses Provide Insight Into the Differential Responses of Acanthus Ilicifolius and Its Relative, Acanthus Mollis, to Tidal Flooding Stress
Source: Preprints.org preprint supplement (doi:10.20944/preprints202012.0169.v1), 2020-12-07
Supplement: Supplementary file 5 [file Supplementary Table S2.xlsx]

## Sheet: A. ilicifolius leaves
No.	Accession (gb)	Protein Name	Theoretical (Mr)	Theoretical (pI)	Score	MP	Sequence
1	gi|222842405	Plastocyanin family protein	17073.6	4.94	98	2	VSASPLPR	IVFKNNAGFPHNVLFDEDAVPSGVDVSK
2	gi|449515811	PREDICTED: chlorophyll a-b binding protein 40,chloroplastic-like, partial	15982.9	6.58	88	2	VTMRK	WAMLGALGCVFPELLSR
3	gi|26454609	14-3-3 protein 7	28910.4	4.96	137	3	EKQVYLAR	DSTLIMQLLR	LGLALNFSVFYYEILNSPER
4	gi|475522663	Ribulose bisphosphate carboxylase/oxygenase activase B, chloroplastic	51470.1	8.86	268	5	FYWAPTR	MCCLFINDLDAGAGR	LVDTFPGQSIDFFGALR	VPIIVTGNDFSTLYAPLIR	MASAFSSTVGAPCGVRV
5	gi|508726181	Rubisco activase isoform 2	52372	5.26	407	10	FYWAPTR	DDRIGVCK	VPLILGIWGGK	SFQCELVFAK	FSNSKLPSVSFK	MCCLFINDLDAGAGR	LVDTFPGQSIDFFGALR	VPIIVTGNDFSTLYAPLIR	MGINPIMMSAGELESGNAGEPAK	GTFYGKAAQQIGVPVPEGCTDPGADNFDPTAR
6	gi|449454235	Predicted: V-type proton ATPase subunit B 1-like	54362.7	4.96	103	10	FQEIVNIR	FVTQGAYDTR	GPKFQEIVNIR	QIYPPINVLPSLSR	NIFQSLDLAWTLLR	VTLFLNLANDPTIER	HVLVILTDMSSYADALR	GYPGYMYTDLATIYER	IPLFSAAGLPHNEIAAQICR	TYPEEMIQTGISTIDVMNSIAR
7	gi|508787184	RuBisCO large subunit-binding protein subunit alpha isoform 1	64074.8	5.08	108	9	VVNDGVTIAR	WLTYSGEAR	LNYRQGNSR	LADAVGLTLGPR	TVQGLVEELEK	VGAATETELEDR	TVQGLVEELEKK	TNDSAGDGTTTASVLAR	MASANALSSASILCSPK
8	gi|449442347	Predicted: stromal 70 kDa heat shock-related protein, chloroplastic-like	75464.1	5.18	67	7	FEELCSDLLDR	QFAAEEISAQVLR	QFAAEEISAQVLR	AVVTVPAYFNDSQR	AVVTVPAYFNDSQR	AKFEELCSDLLDR	AKFEELCSDLLDR	KQDITITGASTLPSDEVER	SEVFSTAADGQTSVEINVLQGER
9	gi|502125499	Predicted: ruBisCO large subunit-binding protein subunit beta, chloroplastic-like	63199.2	5.85	162	6	IAALK	APGFGER	TAKALVAELK	AAVEEGIVVGGGCTLLR	DTLANDEEKVGADIVK	SAENSLYVVEGMQFDR
10	gi|332003097	Heat shock cognate protein 70-1	71712.3	5.03	322	16	ALRR	ITITNDK	VEIIANDQGNR	DAGVIAGLNVMR	MVNHFVQEFK	FEELNMDLFR	NALENYAYNMR	STVHDVVLVGGSTR	TTPSYVAFTDSER	ARFEELNMDLFR	ATAGDTHLGGEDFDNR	NAVVTVPAYFNDSQR	NQVAMNPVNTVFDAKR	GEGPAIGIDLGTTYSCVGVWQHDR	EQVFSTYSDNQPGVLIQVYEGER	TLSSTAQTTIEIDSLYEGIDFYSTITR
11	gi|460369188	Predicted: stromal 70 kDa heat shock-related protein, chloroplastic-like	74964.8	5.2	97	3	AVVTVPAYFNDSQR	LSFSDIDEVILVGGSTR	SEVFSTAADGQTSVEINVLQGER
12	gi|222859802	Chlorophyll a-b binding protein 2	28092.1	5.29	87	6	ELEVIHSR	FGEAVWFK	AVKLSPSSPELMGNGR	AAATMALSSPAFAGKAVK	WAMLGALGCVFPELLSR	LAMFSMFGFFVQAIVTGK
13	gi|475542040	Chlorophyll a-b binding protein, chloroplastic	28717.3	5.14	114	6	FGEAVWFK	ELEVIHCR	NRELEVIHCR	NGVKFGEAVWFK	AKQVASSSPWYGADR	WAMLGALGCVFPELLSR
14	gi|449469841	PREDICTED: 14-3-3-like protein-like	29643.8	4.77	90	3	DSTLIMQLLR	KEAAEATLLAYK	LGLALNFSVFYYEILNSPDR
15	gi|542718032	Ribulose-1,5-bisphosphate carboxylase/oxygenase large subunit, partial (chloroplast)	38087.3	6.49	294	11	NHGMHFR	DTDILAAFR	QKNHGMHFR	DNGLLLHIHR	DITLGFVDLLR	NHGMHFRVLAK	LEDLRIPPAYVK	DDENVNSQPFMR	TFQGPPHGIQVER	ALRLSGGDHIHSGTVVGK	GGLDFTKDDENVNSQPFMR
16	gi|449442663	Predicted: phosphoglycolate phosphatase-like	41715.8	6.47	63	3	ENPGCLFIATNR	LIDGVPETLDMLR	FGIQKSQICMVGDR
17	gi|508722909	20S proteasome alpha subunit F2	33237.4	4.76	120	4	DALMAIR	ANSELSSHQKK	VDDHIGVAIAGLTADGR	NQYDTDVTTWSPAGR
18	gi|474352688	Oxygen-evolving enhancer protein 1, chloroplastic	34635.5	5.75	352	7	LMTR	NEPPAFQK	VPFLFTVK	RLTFDEIQSK	GGSTGYDNAVALPAGGR	DGIDYAAVTVQLPGGER	MAGFALATSALLVSGASAEGAPKR
19	gi|410927414	Chloroplast ribulose bisphosphate carboxylase/oxygenase activase beta1, partial	33155.4	5.09	274	4	FYWAPTR	MCCLFINDLDAGAGR	LVDTFPGQSIDFFGALR	VPIIVTGNDFSTLYAPLIR
20	gi|508727025	Phosphate transporter traffic facilitator1 isoform 2	34310.3	6.46	62	6	NLKLFAK	IIVDEVRAHK	NSDEKIELCR	GAGGSVTCGSWIR	YLALGSKDGDICVVDVK	SMTPPGSAPSSSSVIEIFSFDPK
21	gi|545719412	ATP synthase CF1 alpha subunit (chloroplast)	55565.2	5.15	547	18	FLVELR	ELIIGDR	IEQYNR	QMSLLLR	ATQNQLAR	KFLVELR	ADEISNIIR	ERIEQYNR	ERFLLQEQG	LIESPAPGIISR	VINALAKPIDGR	FLVELRTYVK	IAQIPVSEAYLGR	ASSVAQVVNTLQER	EAYPGDVFYLHSR	IVNTGTVLQVGDGIAR	MVTIRADEISNIIR	SVYEPLQTGLIAIDSMIPIGR
22	gi|508718683	Tubulin alpha-5	53996.5	4.98	433	10	EDAANNFAR	EIVDLCLDR	YMACCLMYR	QLFHPEQLISGK	LISQIISSLTTSLR	SLDIERPTYTNLNR	AIFVDLEPTVIDEVR	AVCMISNNTAVAEVFSR	AFVHWYVGEGMEEGEFSEAR	FDGAINVDITEFQTNLVPYPR
23	gi|335060120	ATP synthase beta subunit	52294.3	5.15	774	18	TTFPIHR	LSIFETGIK	AVAMSATDGLMR	MPNIYNALVVK	AHGGVSVFGGVGER	IVGEEHYETAQR	FVQAGSEVSALLGR	VGLTALTMAEYFR	TREGNDLYMEMK	VRAVAMSATDGLMR	VALVYGQMNEPPGAR	DVNEQDVLLFIDNIFR	IFNVLGEPIDNLGPVDTR	GIYPAVDPLDSTSTMLQPR	GMEVIDTGAPLNVPVGGATLGR	IAESKVALVYGQMNEPPGAR	MPSAVGYQPTLSTEMGSLQER	EGSITSIQAVYVPADDLTDPAPATTFAHLDATTVLSR
24	gi|449434570	PREDICTED: ATP synthase subunit beta, mitochondrial-like	59885.2	5.9	571	16	MTVARAR	EGNDLYR	VVDLLAPYQR	IINVIGEPIDER	AHGGFSVFAGVGER	VGLTGLTVAEHFR	VLNTGSPITVPVGR	ASSRSPFSNPNPR	TIAMDGTEGLVRGR	FTQANSEVSALLGR	CALVYGQMNEPPGAR	LVLEVAQHLGENMVR	MLSPHILGEDHYNTAR	DAEGQDVLLFIDNIFR	QISELGIYPAVDPLDSTSR	IPSAVGYQPTLATDLGGLQER
25	gi|508784980	TCP-1/cpn60 chaperonin family protein	64512.9	5.62	153	5	APGFGER	VVAAGANPVLITR	GYISPYFVTDGEK	AAVEEGIVVGGGCTLLR	SQYLDDIAILTGGTVIR
26	gi|508726275	Heat shock cognate protein 70-1	71745.3	5.03	646	19	VEIIANDQGNR	DAGVIAGLNVMR	MVNHFVQEFK	FEELNMDLFR	NALENYAYNMR	STVHDVVLVGGSTR	MVNHFVQEFKR	VQQLLQDFFNGK	TTPSYVAFTDTER	ARFEELNMDLFR	QATKDAGVIAGLNVMR	ATAGDTHLGGEDFDNR	NAVVTVPAYFNDSQR	VIAGPGDKPMIVVNYK	QFAAEEISSMVLIKMR	GEGPAIGIDLGTTYSCVGVWQHDR	EQVFSTYSDNQPGVLIQVYEGER	KEQVFSTYSDNQPGVLIQVYEGER	TLSSTAQTTIEIDSLYEGIDFYSTITR
27	gi|508784980	TCP-1/cpn60 chaperonin family protein	64512.9	5.62	503	15	APGFGER	LVRQAAAK	APGFGERK	MAVEYENCK	NAGVNGSVVSEK	LADLVGVTLGPK	DLINILEDAIK	VVAAGANPVLITR	GYISPYFVTDGEK	AAVEEGIVVGGGCTLLR	SQYLDDIAILTGGTVIR	SAENSLYVVEGMQFDR	LSGGVAVIQVGAQTETELK	TNDLAGDGTTTSVVLAQGLIAEGVK	YGYNAATGKYEDLMAAGIIDPTK
28	gi|293334615	Heat shock cognate 70 kDa protein 2	71521.1	5.13	329	13	VEIIANDQGNR	DAGVISGLNVMR	FEELNMDLFR	RFSDTSVQSDAK	NTLENYAYNMR	SSVHDVVLVGGSTR	TTPSYVAFTDSER	ARFEELNMDLFR	ATAGDTHLGGEDFDNR	NAVVTVPAYFNDSQR	VIPGSGDKPMIGVQFR	SINPDEAVAYGAAVQAAILTGEGNEK	KEQVFSTYSDNQPGVLIQVYEGER
29	gi|332643321	Heat shock protein 60	61584.4	5.66	163	7	APGFGENR	SVAAGMNAMDLR	NVVIEQSWGAPK	TLFNELEVVEGMK	RGISMAVDAVVTNLK	MISTSEEIAQVGTISANGER	QVANATNDVAGDGTTCATVLTR
30	gi|449464210	Predicted: leukotriene A-4 hydrolase homolog	69931.5	5.37	157	5	GFQFLWR	ESYHPIAQR	MVFLTPTVIK	LKTNQEGVDPDDVYSR	NNEHFWLNEGFTTYAER
31	gi|508782306	Eukaryotic translation initiation factor 5A-1	17769.8	5.6	115	3	TFPQQAGTIR	LEDIVPSSHNCDVPHVNR	KLEDIVPSSHNCDVPHVN
32	gi|508726652	ATP synthase D chain, mitochondrial	19652	0	98	5	KFDDEIR	EIAEVQELKK	ASKNIDWEGMAK	FDDEIRNDYWGY	FSQEPEPIDWEYYR
33	gi|223540996	Chlorophyll a/b binding protein, putative	31100.1	5.52	75	5	WYGPDR	WYGPDRR	FGANCGPEAVWFK	WAMLGAAGFIVPEAFNK	SAAPTSSTPSTLKTVALFSK
34	gi|449458564	PREDICTED: triosephosphate isomerase, chloroplastic-like	33003.9	7.01	340	5	FFVGGNWK	GGAFTGEISVEQLK	KEDIDGFLVGGASLK	VATPEQAQEVHAAIR	AAYALSEGLGVIACIGELLEER
35	gi|223544718	Groes chaperonin, putative	26582.2	8.89	61	5	DLKPLNDR	SLVVKAATVVAPK	DLKPLNDRVFIK	ATAQLTASSVSLSAR	EDDIVGVLETDDIK
36	gi|474311703	L-ascorbate peroxidase 1, cytosolic	27561.1	5.85	117	5	NCSPLMLR	SGFEGPWTR	FDNSYFTELLSGDK	MAKTYPVVSAEYQEAVEK	QMGLSDQDIVALSGGHTLGR
37	gi|425856442	Mta/sah nucleosidase, partial	23864	5.67	69	2	VPFIVIR	FADFGTNK
38	gi|317373797	Chloroplast phosphoglycerate kinase 3	50283.8	6.69	121	10	YSLAPLVPR	TPTVRLHSR	IGVIESLLEK	RPFAAIVGGSK	FAVGTEAVAKK	VILSSHLGRPK	SVGDLSPAELKGK	LASLADLYVNDAFGTAHR	ADLNVPLDDNQNITDDTR		YSLAPLVPRLTELIGVEVVK
39	gi|223541989	Phosphoribulose kinase, putative	45220.9	5.83	302	11	GVTALDPR	DLYEQIIASK	FYGEVTQQMLK	DLYEQIIASKAK	RLTSVFGGAAEPPK	KPDFDAYIDPQK	IRDLYEQIIASK	GHSLESIKASIEAR	LDELIYVESHLSNISTK	ASIEARKPDFDAYIDPQK	NFNPVYLFDEGSTISWIPCGR
40	gi|386278562	Actin7a, partial	39389.9	5.21	271	9	AGFAGDDAPR	AVFPSIVGRPR	IWHHTFYNELR	LDLAGRDLTDALMK	NYELPDGQVITIGAER	YPIEHGIVSNWDDMEK	DLYGNIVLSGGSTMFPGIADR	MADAEDIQPLVCDNGTGMVK	TTGIVLDSGDGVSHTVPIYEGYALPHAILR
41	gi|223540420	Cell division protein ftsH, putative	75504.2	6.43	467	7	FLEYLDKDR	FDADVSLDIIAMR	LSDSAYEIALSHIR	ENAPCIVFVDEIDAVGR	TPGFSGADLANLLNEAAILAGR	AIAGEAGVPFFSISGSEFVEMFVGVGASR	EQTLNQLLTEMDGFEGNTGIIVIAATNR
42	gi|475605012	Cell division protease ftsH-like protein, chloroplastic	71940.5	5.6	271	8	FLEYLDKDR	QDFMEVVEFLK	ADILDSALLRPGR	FDADVSLEVIAMR	ENAPCIVFVDEIDAVGR	AKENAPCIVFVDEIDAVGR	TPGFSGADLANLLNEAAILAGR	VDLFENGTIAIVEAISPELGNR
43	gi|350537279	Vacuolar H+-ATPase A2 subunit isoform	68956	5.3	534	19	WAEALR	LGDLFYR	MTYTLIK	SGDVYIPR	ITLETAKLLR	LAADTPLLTGQR	VGHDNLIGEIIR	FDPDFINIRTK	DTVLELEFQGVK	TTLVANTSNMPVAAR	DMGYNVSMMADSTSR	YSNSDTVVYVGCGER	EASIYTGITIAEYFR	FEDPPEGEDALVAKFK	LAEMPADSGYPAYLAAR	NIIHFYNLANQAVER	VSGPVVVADGMAGAAMYELVR	LAEMPADSGYPAYLAARLASFYER	LEGDSATIQVYEETAGLMVNDPVLR
44	gi|350537129	Vacuolar H+-ATPase A1 subunit isoform	68956	5.2	268	14	WAEALR	LGDLFYR	LASFYER	SGDVYIPR	ITLETAKLLR	LAADTPLLTGQR	VGHDNLIGEIIR	FDPDFINIRTK	FQKLHDDLVAGFR	YSNSDTVVYVGCGER	EASIYTGITIAEYFR	LAEMPADSGYPAYLAAR	NIIHFYNLANQAVER	LEGDSATIQVYEETAGLMVNDPVLR
45	gi|223550217	ATP-dependent clp protease, putative	103117	6.27	382	19	LDEMIVFR	TAIAEGLAQR	YRGEFEER	LDMSEFMER	VIMLAQEEAR	HIEKDPALER	RVLELSLEEAR	QYFRPEFLNR	VLENLGADPSNIR	GSGFVAVEIPFTPR	RPYTVVLFDEIEK	ALAAYYFGSEEAMIR	GELQCIGATTLDEYR	GELQCIGATTLDEYRK	IGFDLDYDEKDSSYNR	AHPDVFNMMLQILEDGR	QLGHNYIGSEHLLLGLLR	LIGSPPGYVGYTEGGQLTEAVR	YTDEALVAAAQLSYQYISDR
46	gi|527186354	Triosephosphate isomerase	33665.3	6.9	314	6	FFVGGNWK	HIIGEDDQFIGK	GGAFTGEISVEQIK	HIIGEDDQFIGKK	RHIIGEDDQFIGK	QEDIDGFLVGGASLK
47	gi|15237579	RNA-binding protein NOB1	67082.9	5.55	61	14	AMSVFSQK	EANETHAK	QLHRWILK	DMRLEEESLR	FVTVPEVLSEIR	ATGDLQSLSDVDLK	NPNDNHYSRSMH	DPKPTSMWSSIVK	NGEDISSILKDMR	LLAPGGMQIRQLHR	DPKPTSMWSSIVKK	MDPKPTSMWSSIVK	FARATGDLQSLSDVDLK	MVVEGVDASQGQYDDDDDASDWRPAVSR
48	gi|332005925	6-phosphogluconolactonase 4	29510.1	6.23	91	2	MASVLEKTK	WHIFWVDER
49	gi|222864107	Cytosolic phosphoglycerate kinase family protein	42766.7	5.7	314	7	YSLKPLVPR	FAAGTEAIAWK	SVSSLKETDLK	LVAEIPGGGVLLLENVR	LASLAEVYVNDAFGTAHR	VDLNVPLDDNFNITDDTR	MSHISTGGGASLELLEGKPLPGVLALDDA
50	gi|222848536	ATP synthase gamma chain 1 family protein	41357.8	8.16	263	6	RPYIPVDR	NTQKITEAMK	ALQESLASELAAR	SEPVIHTLLPLSPK	EAQAIADDVFSLFVSEEVDK	GEICDVNGVCVDAAEDEFFR
51	gi|399139809	Ribulose-1,5-bisphosphate carboxylase/oxygenase large subunit, partial	51.58/6.30	6.3	388	9	NHGMHFR	ACYECLR	DLAAEGNAIIR	QKNHGMHFR	DNGLLLHIHR	DITLGFVDLLR	DDENVNSQPFMR	WSPELAAACEVWK	ELGVPIVMHDYLTGGFTANTSLAHYCR
52	gi|223547261	Phosphoglycerate kinase, putative	50114	8.74	95	2	ARASLLPVSGLRPTTLR	LASLADLYVNDAFGTAHR
53	gi|343465772	Plastid glutamine synthetase isoform	47015.6	5.75	182	7	YILER	AILNLSLR	IIAEYIWVGGSGIDLR	MAQAVVPAMQCQVGVR	MAQAVVPAMQCQVGVR	MQQLLDMDTTPFTDK	GGNNILVICDTYTPQGEPIPTNK	GGNNILVICDTYTPQGEPIPTNKR
54	gi|332642427	S-adenosylmethionine synthase 4	43167.9	5.51	193	8	TAAYGHFGR	TIFHLNPSGR	NGTCPWLRPDGK	FVIGGPHGDAGLTGR	IIIDTYGGWGAHGGGAFSGK	VLVNIEQQSPDIAQGVHGHLTK	ESFDFRPGMISINLDLK	TQVTIEYINESGAMVPVR
55	gi|475453557	26S protease regulatory subunit 6B-like protein	30125.7	6.54	155	9	KIEFPLPDR	KPETDFDFYK	ADTLDPALLRPGR	MIDPVSFFPILK	ISAADITAICQEAGMHAVR	ENAPAIIFIDEVDAIATAR	MNLSDEVDLEDYVSRPDK	VIMATNRADTLDPALLRPGR	EAVELPLTHHELYKQIGIDPPR
56	gi|350538295	Enolase	48053.5	5.68	233	8	QIFDSR	YNQLLR	HIADLAGNKK	VNQIGSVTESIEAVK	IEEELGSEAVYAGASFR	LAMQEFMILPVGAANFK	LVLPVPAFNVINGGSHAGNK	YGQDATNVGDEGGFAPNIQENK
57	gi|475603792	Heat shock 70 kDa protein, mitochondrial	72912.5	5.53	113	5	SSGGLSESEIEK	FESLVNGLIARTR	AVITVPAYFNDAQR	IINEPTAAALSYGTNNK	GVNPDEAVAMGAALQGGILR
58	gi|428230860	Chlorophyll binding protein, partial	21389.9	5.19	66	2	WLAYGEVFNGR	FAMLGAVGAIAPEIFGK
59	gi|332646593	Proteasome subunit beta type-1	24856.4	6.95	149	4	HLIYQHQHNK	ADGIKTELMDLR	GCVFTYDAVGSYER	VGYGAQGSGSTLIMPFLDNQLK
60	gi|502120213	PREDICTED: flocculation protein FLO11-like isoform X2	66283.5	10.59	69	4	DNNGVIPR	FVNARADATFMVQK	MVAAISENPLTSSRTQEK	SLSVSFQGEAFSLPISKSK
61	gi|406366546	Ribulose-1,5-bisphosphate carboxylase/oxygenase large subunit, partial	19298.8	8.8	61	8	ELEECK	EVDYLLR	QVQCISFIA	EVDYLLRSK	YSSLPGYYDGR	VQCMQVWPPLGK	VQCMQVWPPLGKK	SSPAQANMVAPFTGLK
62	gi|355477483	F-box family protein	19665.8	4.56	63	2	LIPGMSAYLGDIR	LIPGMSAYLGDIRVFK
63	gi|332189573	Malate dehydrogenase	35890.4	6.11	70	7	MDLTAEELK	EEKDLAYSCLS	MELIDAAFPLLK	LSSALSAASSACDHIR	VLVVANPANTNALILK	DDAWLDGEFISTVQQR	NGDWSIVQGLPIDEVSR
64	gi|223526678	Malate dehydrogenase, putative	35890.4	6.4	183	2	LSSALSAASSACDHIR	NVIIWGNHSSTQYPDVNHATVK
65	gi|475616276	Putative quinone-oxidoreductase-like protein, chloroplastic	35429	9.13	69	11	KNEVLLK	GDLRPLLPR	YILHGVTFSK	ATPAATPPAKMR	RLVPLLVSPNK	GLGADEVMDYR	VEAAAINPLDCK	LANLHVTATCGAR	IQKGDLRPLLPR	AVLYDACGGGSAGLK	TVIDSRFPLGDAGK
66	gi|550319185	Glutamate-ammonia ligase family protein	39420.8	5.95	153	7	YILER	WGVANR	GYFEDR	VGRDTEK	EGKGYFEDR	EHIAAYGEGNER	IIAEYIWVGGSGMDIR
67	gi|332642304	Mitochondrial processing peptidase alpha subunit	54190.4	6.04	104	2	QILTYGER	SAILMNLESR
68	gi|485820030	Enolase, partial	11863.1	7.98	84	3	YNQLLR	IEEELGADAIYAGASFR	VNQIGSVTESIEAVRMSK
69	gi|449450860	Elongation factor 2-like	95031.9	5.97	133	8	FFAFGR	LWPMLQK	SKILSEEFAWDK	VRIMGPNYVPGEK	AYLPVIESFGFSSTLR	GTVAFSAGLHGWAFTLTNFAK	CFLELQVDGEEAYQTFQR	STLTDSLVAAAGIIAQEVAGDVR
70	gi|436805717	Copper/zinc-superoxide dismutase	15389.5	5.47	96	2	EHGAPEDENR	QIPLTGPNSVVGR
71	gi|550338673	Chain A family protein	40792.8	8.54	70	10	LDFAVSR	MYIQTR	SFLWKMFFEK	KDNTYVYMCGLK	STSLSSRTTLIAPER	LYSIASSAIGDFGDSK	MAEYAEELWELLK	GMEKGIDEIMVSLAAK	GVCSNFLCDLKPGAEVK	EMLMPKDPNATIIMLGTGTGIAPFR
72	gi|514725733	Predicted: chloroplast stem-loop binding protein of 41 kDa a, chloroplastic-like	41485.9	6.41	203	6	AFPFR	IFNCVSDR	DMAFDLDDK	NMHFYAEPR	DCEEWFFDR	DLDAVKPVADWAK
73	gi|508711124	Glyceraldehyde-3-phosphate dehydrogenase A subunit2	43255.4	8.15	407	11	NFLR	CWHGR	LLDASHR	VAINGFGR	IIKVVSNR	TFAEEVNAAFR	GTMTTTHSYTGDQR	DSPLDVIAINDTGGVK	VIAWYDNEWGYSQR	ELNGILSVCDEPLVSVDFR	DSAEKELNGILSVCDEPLVSVDFR
74	gi|499138229	Dihydrolipoamide dehydrogenase, partial	43939.3	7.79	145	4	HSFAGHGVK	AKAIDDAEGIVK	FVHNLISAMLR	LTLEPASGGDQTTIEADVVLVSAGR
75	gi|413916139	Glycine cleavage complex P-protein	119113	6.79	118	8	FWPTTGR	HYPVLFR	VDNVYGDR	GNINIEELR	LFKVFNNGK	FCDALISIR	GISTLSPPPPAAGK	VINISLTAKSMCVLAR
76	gi|332660759	Glycine cleavage complex P-protein	119113	6.79	99	8	FWPTTGR	HYPVLFR	VDNVYGDR	GNINIEELR	LFKVFNNGK	FCDALISIR	GISTLSPPPPAAGK	VINISLTAKSMCVLAR
77	gi|226491656	Peptidyl-prolyl cis-trans isomerase	26372.5	0	155	6	SIYGR	EAELQSK	VVISECGELPVV	VYFDISIGNPVGK	KVVISECGELPVV	VISDFMIQGGDFDK
78	gi|543177006	Peptidyl-prolyl cis-trans isomerase	27372	9.46	277	4	SIYGR	TPWLDQR	DFMIQGGDFDK	HVVFGQVLEGMDIVR

## Sheet: A. ilicifolius roots
No.	Accession (gb)	Protein Name	Theoretical (Mr)	Theoretical (pI)	Score	MP	Sequence
R1	gi|223529085	Peroxidase, putative	19452.8	8.6	74	1	TQLETSCPGVVSCADILAVAAR
R2	gi|526117762	14-3-3 protein	29471.6	4.79	132	2	DDEQQ	LGLALNFSVFYYEILNSPDR
R3	gi|350539221	14-3-3 protein 7	28910.4	4.96	110	2	EKQVYLAR	LGLALNFSVFYYEILNSPER
R4	gi|543176851	14-3-3 protein	29255.5	4.66	277	7	LAEQAER	LIPSASSGDSK	DSTLIMQLLR	YEEMVEFMEK	GNEDHVAVIRDYR	SAQDIANAELPPTHPIR	LGLALNFSVFYYEILNSPD
R5	gi|125562472	Hypothetical protein OsI_30174	16212	8.51	73	6	TPVFVELLR	KWQGMGAIGR	WQGMGAIGRK	RFEIPLAYLR	MAQHQHFAVCSI	ALLSSIVMPCSHHPSR
R6	gi|226521422	Predicted protein	88695.5	5.56	68	14	ALERCR	AADATRALER	EESTRLAER	LTERDGTEAK	AIQDAANANNR	LEEQTRTMR	MSADPNALLAFK	DEASNALQALER	VAALEEQVAGLKR	AVCDERDELATR	SMLRCSVCNDRPK	SADPNALLAFKQSNLK	ANAGHHEGLPPMATAAGAR	DGASGGPNRSGEPNTAASTAAYQSLER
R7	gi|223532621	Proteasome subunit beta type 6,9, putative	24911.5	5.17	109	3	ITQLTDNVYVCR	SGSAADSQIVSDYVR	VAANLVRLISYNNK
R8	gi|508724744	Pathogen-related protein	27540.6	5.1	64	4	VEFFYDR	KYVFSLNGK	TWEMEIFHK	ELSNVEGDKYR
R9	gi|527206839	Hypothetical protein M569_02468	27344.1	9.01	76	4	AFSAGMDVK	RIATMADEFVK	ALNAMNLDMDVK	SPGEGAVGAYLGLTGNR
R10	gi|460407876	V-type proton ATPase subunit d2-like	41297.2	4.9	154	6	LREQEIR	DVQELLEK	AYLEDFYR	AFYEEEVKR	AVNITINSIGTELTR	NLMWISECVSQNQKTR
R11	gi|449454235	Predicted: V-type proton ATPase subunit B 1-like	54362.7	4.96	393	9	FQEIVNIR	QIYPPINVLPSLSR	NIFQSLDLAWTLLR	VTLFLNLANDPTIER	HVLVILTDMSSYADALR	GYPGYMYTDLATIYER	IPLFSAAGLPHNEIAAQICR	AVVGEEALSSEDLLYLEFLDKFER	IFNGSGKPIDNGPPILPEAYLDISGSSINPSER
R12	gi|470108902	Predicted: V-type proton ATPase subunit B2-like	54609.9	5.07	72	8	FQEIVNIR	ELLHRIPIK	FVSQGAYDTR	GPKFQEIVNIR	QIYPPINVLPSLSR	VTLFLNLANDPTIER	HVLVILTDMSSYADALR	IPLFSAAGLPHNEIAAQICR
R13	gi|315307966	Heat shock protein 90-1	80452.9	4.96	155	5	APFDLFDTR	DSSMAGYMSSK	RAPFDLFDTR	EDQLEYLEER	GIVDSEDLPLNISR
R14	gi|527187624	Heat shock protein 70	71617.3	5.06	513	22	YKSEDEEHK	FELTGIPPAPR	VEIIANDQGNR	DAGVIAGLNVMR	MVNHFVQEFK	FEELNMDLFR	NTLENYAYNMR	STVHDVVLVGGSTR	VQQLLQDFFNGK	TTPSYVAFTDTER	ARFEELNMDLFR	ATAGDTHLGGEDFDNR	NAVVTVPAYFNDSQR	VIPGPGDKPMIVVSYK	IINEPTAAAIAYGLDKK	NQVAMNPVNTVFDAKR	WLDANQLGEADEFEDK	SINPDEAVAYGAAVQAAILSGEGNEK	GEGPAIGIDLGTTYSCVGVWQHDR	EQVFSTYSDNQPGVLIQVYEGER	TLSSTAQTTIEIDSLYEGIDFYTSITR	KEQVFSTYSDNQPGVLIQVYEGER
R15	gi|223535705	60S ribosomal protein L23, putative	7173	11.09	74	4	MEPIKDVEAR	LPSTCVATVKK	KFMLAVIVCQHKPWHR
R16	gi|490262869	ATP synthase subunit D, partial	19244.8	5.21	102	2	FDDEIRNDYWGY	FSQEPEPIDWEYYR
R17	gi|474311703	L-ascorbate peroxidase 1, cytosolic	27561.1	5.85	160	4	GSDHLR	NCSPLMLR	FDNSYFTELLSGDK	QMGLSDQDIVALSGGHTLGR
R18	gi|557113120	Hypothetical protein EUTSA_v10025711mg	34878.9	6.07	139	4	RLTFDEIQSK	DVKIQGIWYAQLE	MVASLQAAVTTVALPSR	DGIDYAAVTVQLPGGER
R19	gi|355479515	Adenosine kinase	38081.9	5.08	104	4	AGCYAANVIIQR	SLIANLSAANCYK	VHGWETENVEEIALK	YNVEYIAGGATQNSIR
R20	gi|527187175	Monodehydroascorbate reductase	47197.7	5.82	118	3	NIFYLR	AYLFPEGTAR	LPGFHVCVGSGGER
R21	gi|527203530	Actin-97	41947.1	5.37	698	14	VVAPPER	RGILTLK	AGFAGDDAPR	GYSFTTSAER	HTGVMVGMGQK	DAYVGDEAQSK	AVFPSIVGRPR	AEYDESGPSIVHR	IWHHTFYNELR	NYELPDGQVITIGAER	YPIEHGIVSNWDDMEK	VAPEEHPILLTEAPLNPK	DLYGNIVLSGGTTMFPGIADR	TTGIVLDSGDGVSHTVPIYEGYALPHAILR
R22	gi|473798701	ATP synthase subunit beta, mitochondrial	57827	5.25	719	10	VVDLLAPYQR	AHGGFSVFAGVGER	VGLTGLTVAEHFR	VLNTGSPITVPVGR	FTQANSEVSALLGR	CALVYGQMNEPPGAR	LVLEVAQHLGENVVR	DAEGQDVLLFIDNIFR	QISELGIYPAVDPLDSTSR	IPSAVGYQPTLATDLGGLQER
R23	gi|508784980	TCP-1/cpn60 chaperonin family protein	64512.9	5.62	159	6	VVAAGANPVLITR	GYISPYFVTDGEK	VVRCCLEHASSVAK	AAVEEGIVVGGGCTLLR	SQYLDDIAILTGGTVIR	SAENSLYVVEGMQFDR
R24	gi|473749533	NuA3 HAT complex component NTO1	103458	7.88	63	17	GYAYVPR	SSLVLEDK	IIKWLQK	ILEEEKAIR	DNDKILEEEK	CTKEGGSGTMQR	YLEICIGRWK	YWPEEVNSLKR	EKDTCCVCNIK	TKIAHLWNHDLK	WDFIRVNQFLR	EYTGNLSLTGGKDTAK	ELVMTSDQASTQNQR	VVQNLSCELDVFSKR	CNSEDCHTTFHPSCAR	LLGSGTILRFMHQPVEPK	GPLAANAQHMILQQAETFQK
R25	gi|375968572	SKP1 protein	17629.8	0	141	5	RENAWAFE	NDFTPEEEEEVR	NDFTPEEEEEVRR	SLLDLTCQTVADMIK	SSDGETFEVEEAVALESQTIK
R26	gi|346683384	ATPase subunit 1	55243.7	5.58	435	11	AMLGR	ELIIGDR	QMSLLLR	GALSDHER	LELAQYR	AVDSLVPIGR	SVHEPMQTGLK	GIRPAINVGLSVSR	EAFPGDVFYLHSR	EILVIYAAVNGFCDR	EVAAFAQFGSDLDAATQALLNR
R27	gi|527189531	Protein disulfide-isomerase, partial	38128.4	5.26	109	4	YGKIYVK	YGVSGFPTLK	YGVSGYPTIQWFPK	DRGALVEFYAPWCGHCK
R28	gi|527203530	Actin-97	41947.1	5.37	706	16	AGFAGDDAPR	GYSFTTSAER	AVFPSIVGRPR	IWHHTFYNELR	AEYDESGPSIVHRK	NYELPDGQVITIGAER	YPIEHGIVSNWDDMEK	VAPEEHPILLTEAPLNPK	NYELPDGQVITIGAERFR	DLYGNIVLSGGTTMFPGIADR	AVFPSIVGRPRHTGVMVGMGQK	GILTLKYPIEHGIVSNWDDMEK	KYSVWIGGSILASLSTFQQMWIAK	TTGIVLDSGDGVSHTVPIYEGYALPHAILR	FRCPEVLFQPSMIGMEAAGIHETTYNSIMK	IWHHTFYNELRVAPEEHPILLTEAPLNPK
R29	gi|449434570	Predicted: ATP synthase subunit beta, mitochondrial-like	59885.2	0	121	16	VVDLLAPYQR	IINVIGEPIDER	AHGGFSVFAGVGER	VGLTGLTVAEHFR	VLNTGSPITVPVGR	EMIESGVIKLGDK	TIAMDGTEGLVRGR	FTQANSEVSALLGR	CALVYGQMNEPPGAR	LVLEVAQHLGENMVR	SPFSNPNPRISPSTTSR	DAEGQDVLLFIDNIFR	VAEYATSAAATAPPSPPPPAK	QISELGIYPAVDPLDSTSRQER	IPSAVGYQPTLATDLGGLIKVVDLLAPYQR	EAPAFVDQATEQQILVTG
R30	gi|110288667	Enolase, putative, expressed	51892.4	5.72	492	11	QIFDSR	YNQLLR	TYDLNFK	VNQIGSVTESIEAVK	AAVPSGASTGVYEALELR	QLVLPVPAFNVINGGSHAGNK	SGETEDTFIADLAVGLATGQIK	YGQDATNVGDEGGFAPNIQENK	AGYTGKVVIGMDVAASEFYNDK	KYGQDATNVGDEGGFAPNIQENK	AAVPSGASTGVYEALELRDGGSDYLGK
R31	gi|427199300	Thioredoxin	13674.9	5.76	183	4	MIAPILAEIAK	VEAMPTFVFLK	MIAPILAEIAKK	LVVVDFTASWCGPCR
R32	gi|398363571	Fructokinase	34685.9	5.49	123	4	EFMFYR	TALAFVTLR	IVDDWSVLEDEAKLK	VFHYGSISLIVEPCR
R33	gi|332656685	S-adenosyethionine synthase 2	43626.9	5.67	346	7	TAAYGHFGR	TIFHLNPSGR	FVIGGPHGDAGLTGR	IIIDTYGGWGAHGGGAFSGK	VHTVLISTQHDETVTNDEIAR	IVKETFDFRPGMMTINLDLK	CKVLVNIEQQSPDIAQGVHGHFTK
R34	gi|351722651	Glutamine synthetase cytosolic isozyme 1	38991.4	5.46	154	5	YILER	VGRDTEK	EHIAAYGEGNER	SMREDGGYEVIK	VIAEYIWIGGSGMDLR
R35	gi|557531169	Hypothetical protein CICLE_v10012166mg	36155.9	9.43	140	3	ALFSQITTRF	TEAVKVLSMAK	AEQYLADSGIPYTIIR
R36	gi|223551378	Catalase, putative	113359	6.84	234	11	FSTVIHER	SHLQENWR	LFAYSDTQR	APGVQTPVIVR	FHWKPTCGVK	LGPNYLQLPVNAPK	EGNFDIVGNNFPVFFIR	GFFEVTHDVSHLTCADFLR	CPYHNNHYDGFMNFMHR	LMIQTMDPADEDKFSFDPLDMTK
R37	gi|226503019	Malate dehydrogenase, cytoplasmic	35846.3	5.76	127	2	MDATAQELSEEKSLAYSCLE	NVIIWGNHSSTQYPDVNHATVK
R38	gi|527196189	Nucleoside diphosphate kinase	16477.6	6.43	143	4	GLVGEIIGR	GDYAIDIGR	EIALWFPEGIAEWR	KEIALWFPEGIAEWR
R39	gi|15239652	Flavodoxin-like quinone reductase 1	21404.8	5.96	84	2	AFLDATGGLWR	GGSPYGAGTFAGDGSR
R40	gi|351722651	Glutamine synthetase cytosolic isozyme 1	38991.4	5.46	186	6	YILER	GYFEDR	VGRDTEK	EHIAAYGEGNER	SMREDGGYEVIK	VIAEYIWIGGSGMDLR

## Sheet: A. mollis leaves 
No.	Accession (gb)	Protein Name	Theoretical (Mr)	Theoretical (pI)	Score	MP	Sequence
1	gi|502111694	Predicted: peroxiredoxin-2E, chloroplastic-like	23443.2	7.67	125	1	AIGCELDLSDKPVGLGVR
2	gi|226500014	3-beta hydroxysteroid dehydrogenase/isomerase family protein	32732.2	8.34	77	1	YPASGVVLRPGFIYGK
3	gi|399139356	Ribulose-1,5-bisphosphate carboxylase/oxygenase large subunit, partial	51487	6.46	654	19	AVFAR	IPPAYIK	NHGMHFR	AMHAVIDR	DTDILAAFR	VALEACVKAR	DLAAEGNAIIR	QKNHGMHFR	DNGLLLHIHR	DITLGFVDLLR	LTYYTPEYETK	DDENVNSQPFMR	LSGGDHIHSGTVVGK	TFQGPPHGIQVER	WSPELAAACEVWK	GHYLNATAGTCEEMIK	GHYLNATAGTCEEMIKR	DITLGFVDLLRDDFVEK	VTPQPGVPPEEAGAAVAAESSTGTWTTVWTDGLTSLDR
4	gi|502111694	Predicted: peroxiredoxin-2E, chloroplastic-like	23443.2	7.67	125	1	AIGCELDLSDKPVGLGVR
5	gi|335059563	Ribulose-1,5-bisphosphate carboxylase/oxygenase large subunit	34093.3	7.83	245	3	DITLGFVDLLR	TFQGPPHGIQVER	ELGVPIVMHDYLTGGFTANTTLAHYCR
6	gi|388503040	Unknown	28240.2	5.47	75	3	ELEVIHSR	FGEAVWFK	SVPSGSPWYGPDR
7	gi|511774224	2-Cys peroxiredoxin, partial	25600.3	8.51	398	11	GLFIIDK	SVDETLR	YEEFQK	NCKPLVSR	ASSEVPLVGNK	SYNVLIPDQGIALR	EGVIQHSTINNLAIGR	SGGLGDLNYPLISDVTK	APDFEAEAVFDQEFIK	GLFIIDKEGVIQHSTINNLAIGR	VNTEILGVSVDSVFSHLAWVQTDR
8	gi|514824684	Predicted: Fanconi anemia group I protein homolog	153865	8	61	13	DNSNASLQK	MTPAETERK	LALEEALYSR	ALSSIQKYLR	RFNEGAVGLLR	SLFEIHEMAR	ATQFVEKGLLK	KLMTSGEDNSR	DQLHLALACLK	TMQSPSIAREVIK	HLVGNWAMDLCRK	CLSQQTSVKEVLYEGLIR	SLFEIHEMARTEIIEQCK
9	gi|12229593	RecName: Full=14-3-3-like protein	29348.8	4.79	96	2	DSTLIMQLLR	SAQDIALAELAPTHPIR
10	gi|222863465	Glutamine synthetase family protein	48206.1	6.48	211	6	YILER	GYLEDR	AILNLSLR	EHISAYGEGNER	TMREEGGFEAIK	IAKNSAPACPMTAK
11	gi|223551115	Proteasome subunit alpha type, putative	30638.1	4.89	192	8	AQVCTQR	QGSAAIGLR	ANSELSSHQK	THVVLACVNK	ANSELSSHQKK	VDDHIGVAIAGLTADGR	NQYDTDVTTWSPAGR	FENFMDSSRDDLIK
12	gi|223533515	Peroxidase 12 precursor, putative	39396.8	7.55	110	2	VVSCSDIVAVAAR	QGLFTSDQDLYTDAR
13	gi|404551307	Glyceraldehyde-3-phosphate dehydrogenase, partial	13458	6.89	133	1	GILGYTDEDLVSTDFLGDNR
14	gi|502137718	Predicted: ribulose bisphosphate carboxylase/oxygenase activase 2, chloroplastic-like	48072.4	8.47	298	7	VYDDEVR	FYWAPTR	VYDDEVRK	VPLILGIWGGK	MCVLFINDLDAGAGR	LLEYGNMLVQEQENVK	VPIVVTGNDFSTLYAPLIR
15	gi|488888859	Chloroplast rubisco activase 1	48369.4	7.66	300	4	FYWAPTR	MCVLFINDLDAGAGR	YMSEAALGDANADAIATGK	VPIVVTGNDFSTLYAPLIR
16	gi|408899417	AtpA, partial (chloroplast)	55134.9	5.53	315	12	FLVELR	QMSLLLR	ATQNQLAR	ADEISNIIR	VGSAAQIKAMK	LIESPAPGIISR	VINALGKPIDGR	IAQIPVSEAYLGR	ASSVAQVVTTLQER	EAYPGDVFYLHSR	IVNTGTVLQVGDGIAR	SVYEPLQTGLIAIDSMIPIGR
17	gi|226499860	Stromal 70 kDa heat shock-related protein	74852.7	5.08	259	6	IAGLEVLR	FEELCSDLIDR	QFAAEEISAQVLR	AVVTVPAYFNDSQR	LSLSDLDEVILVGGSTR	SEVFSTAADGQTSVEINVLQGER
18	gi|412993712	Pre-mRNA-splicing factor 38A	32521.6	5.03	60	10	MLQIAPER	LVGNSAEVYR	GTNPQNMMEK	ATEFLCLALK	YARLLGAFYLR	FALEATGALEERK	EEDVEIAEANALRLK	LVGNSAEVYRYLEPLLNDYR	RAMAMPGETVNVDGDDGEADGAATK	EKCFAVSAETLVDLAVTDLTQIGGIYGGNNR
19	gi|474386333	Poly(C)-binding protein 3	37523.4	6.76	60	10	MWERR	LLPGMRER	GAHLVRHGSPR	DAGGGGCRGGDDR	HGSPRTEAGWR	AVMDAADLLLQK	ITLSGRDQILAGTDR	WVGTNDIQQVSGGGDQR	DADAGRIIGSAGSSIAAMEK	VVFLSGPFRAVMDAADLLLQK
20	gi|543176923	Oxygen-evolving enhancer protein 1	35202	6.08	170	4	LTFDEIQSK	RLTFDEIQSK	DGIDYAAVTVQLPGGER	MASSLQAAATFMQPTKVPLNSR
21	gi|488888859	Chloroplast rubisco activase 1	48369.4	7.66	204	5	VYDDEVR	FYWAPTR	MCVLFINDLDAGAGR	YMSEAALGDANADAIATGK	VPIVVTGNDFSTLYAPLIR
22	gi|355488628	Ribulose bisphosphate carboxylase large chain	19455.7	4.87	72	4	DITLGFVDLLR	MSGGDHIHAGTVVGK	DITLGFVDLLRDDFVEK	MDFFCIILIDSASLVSATRSR
23	gi|408899391	AtpA, partial (chloroplast)	55084.9	5.08	514	17	RPPGR	FLVELR	ELIIGDR	QMSLLLR	ATQNQLAR	ADEISNIIR	VGSAAQIKAMK	ESIQEQMER	LIESPAPGIISR	IFTEEAEALLK	HTLIIYDDLSK	IAQIPVSEAYLGR	ASSVAQVVTTLQER	EAYPGDVFYLHSR	IVNTGTVLQVGDGIAR	SVYEPLQTGLIAIDSMIPIGR	IFTEEAEALLKESIQEQMER
24	gi|145323784	L-ascorbate peroxidase 1	27787.9	5.85	376	6	TGGPFGTMR	NCAPIMVR	DIVALSGAHTLGR	ALLDDPVFRPLVEK	LAWHSAGTFDCQSR	QMGLSDKDIVALSGAHTLGR
25	gi|452119476	Ribulose bisphosphate carboxylase large subunit, partial (chloroplast)	47758.6	0	81	8	DTDILAAFR	QRNHGIHFR	FLFTAEAIYK	DDYIEKDCSR	TFQGPPHGIQVER	VALEACTQARNEGR	ILRMSGGDHLHSGTVVGK	LTYYTPDYQVKDTDILAAFR
26	gi|474445723	Phosphoglycolate phosphatase	33220.9	8.87	64	4	YFNYYK	ENPGCLFIATNR	FGITTSQICMVGDR	KFGITTSQICMVGDR
27	gi|355513999	Phosphoribulokinase	46003.4	6.68	118	11	GVTALDPR	AETPVGAAKA	FYGEVTQQMLK	RLTSVFGGAAEPPK	ANDFDLMYEQVK	DMAERGHSLESIK	ILVIEGLHPMYDSR	ILVIEGLHPMYDSRVR	LDELIYVESHLSNLSSK	HADFPGSNNGTGLFQTIVGLK	GGNPDSNTLISDTTTVICLDDYHSLDR
28	gi|488888860	Chloroplast rubisco activase 2	36402.3	6.33	178	3	FYWAPTR	YMSEAALGDANADAIATGK	VPIVVTGNDFSTLYAPLIR
29	gi|546138044	ATP synthase CF1 alpha subunit (chloroplast)	56144.5	5.7	163	5	RPPGR	THLKK	IAQIPVSEAYLGR	EAYPGDVFYLHSR	SVYEPLQTGLIAIDSMIPIGR
30	gi|402243685	ATP synthase beta subunit, partial (chloroplast)	49693.8	5.11	737	9	AHGGVSVFGGVGER	IVGEEHYETAQR	FVQAGSEVSALLGR	VGLTALTMAEYFR	TVLIMELINNIAK	VALVYGQMNEPPGAR	DVNEQDVLLFIDNIFR	MPSAVGYQPTLSTEMGSLQER	DTVGQPINVTCEVQQLLGNNR
31	gi|410176162	ATP synthase CF1 beta subunit (chloroplast)	53542.8	5.09	939	19	LSIFETGIK	AINLEMELNK	SAPAFIQLDTK	VVDLLAPYRR	AVAMSATDGLMR	EGNDLYMEMK	AHGGVSVFGGVGER	IVGEEHYETAQR	FVQAGSEVSALLGR	VGLTALTMAEYFR	TVLIMELINNIAK	TREGNDLYMEMK	VRAVAMSATDGLMR	VALVYGQMNEPPGAR	DVNEQDVLLFIDNIFR	GIYPAVDPLDSTSTMLQPR	MPSAVGYQPTLSTEMGSLQER	DTVGQPINVTCEVQQLLGNNR	EGSITSIQAVYVPADDLTDPAPATTFAHLDATTVLSR
32	gi|392465167	Heat shock protein 70	71459.3	5.14	140	4	DAGVIAGLNVLR	FEELNMDLFR	TTPSYVGFTDTER	NAVVTVPAYFNDSQR
33	gi|223539254	Oxygen-evolving enhancer protein 2, chloroplast precursor, putative	28756.5	8.63	130	4	RWFK	EFPGQVLR	HQLITAAVK	EREFPGQVLR
34	gi|527197598	Cysteine synthase	34649.3	5.41	100	3	YLSSVLFESVR	LIVVIFPSFGER	IDAFISGIGTGGTITGAGK
35	gi|488888859	Chloroplast rubisco activase 1	48369.4	7.66	283	4	FYWAPTR	MCVLFINDLDAGAGR	YMSEAALGDANADAIATGK	VPIVVTGNDFSTLYAPLIR
36	gi|488888860	Chloroplast rubisco activase 2	36402.3	6.33	212	9	VYDDEVR	FYWAPTR	LLEYGSMLVK	HASAFFGTSLK	WVTEIGVDSIGK	FYWAPTREDR	YMSEAALGDANADAIATGK	VPIVVTGNDFSTLYAPLIR	LLEYGSMLVKEQENVK
37	gi|223535342	Alcohol dehydrogenase, putative	41607.1	8.61	103	3	LNPYLESGK	QFGSLAEYTAVEEK	EGGSVVALTGAVTPPGFR
38	gi|226508704	Elongation factor Tu	50790	6.07	184	6	EGGKTVGAGVINK	YDEIDAAPEER	KYDEIDAAPEER	HYAHVDCPGHADYVK	MVVQLIQPVACEQGMR	TTDVTGNVTVIMNDKDEEAK
39	gi|449440632	Predicted: elongation factor Tu, chloroplastic-like	51885.6	5.9	94	8	EHILLAK	VGETVDIVGLR	KYDEIDAAPEER	GITINTATVEYETENR	DQVDDEELLELVELEMR	QTDLPFLLAVEDVFSITGR	VKMVVELIMPVACEQGMR	ADIQRGMVLAKPGTITPHTK
40	gi|340511990	Ribulose-1,5-bisphosphate carboxylase/oxygenase large subunit, partial(chloroplast)	50772.6	6.23	337	14	NHGMHFR	DTDILAAFR	VALEACVQAR	DLAAEGNAIIR	QKNHGMHFR	DNGLLLHIHR	DITLGFVDLLR	LTYYTPEYETK	DDENVNSQPFMR	TFQGPPHGIQVER	WSPELAAACEVWK	GHYLNATAGTCEEMIK	ALRMSGGDHIHSGTVVGK	GHYLNATAGTCEEMIKR
41	gi|508784980	TCP-1/cpn60 chaperonin family protein	64512.9	5.62	233	3	AAVEEGIVVGGGCTLLR	SQYLDDIAILTGGTVIR	SAENSLYVVEGMQFDR
42	gi|460384911	Predicted: annexin D5-like	35821.7	9.05	79	14	ELHKAMK	DDAMHLYK	AAVINILSHR	TMYSEDLNK	GLGTNDTTLIR	LGTDEKTFIR	TMYSEDLNKR	ATLSIPPVLTTPR	AILLWMYDPAGR	AHLAAVSSAYHSMYSR	KSLNDAVHSETSGDYR	LEKAILLWMYDPAGR	SRAHLAAVSSAYHSMYSR	AATEVICSRTPSQIVHFK
43	gi|474121685	Chlorophyll a-b binding protein 8, chloroplastic	29294.9	8.69	109	3	QYFLGLEK	MAAQGLLSGR	WLAYGEIFNGR
44	gi|449506050	Predicted: glutamine synthetase nodule Isozyme-like	39300.5	5.59	75	4	GYFEDR	EHIAAYGDGNER	EHIAAYGDGNERR	HETADINTFLWGVANR
45	gi|461488119	Succinyl-CoA ligase beta-chain	45404.8	5.98	171	3	EIFAMR	LNFDDNAAFR	LSLVNEMYFAITLDR
46	gi|222856181	Oxidoreductase family protein	39331.2	5.83	81	2	ERFGELK	FGIIGCADIAR
47	gi|317373797	Chloroplast phosphoglycerate kinase 3	50283.8	6.69	284	8	YSLAPLVPR	TPTVRLHSR	IGVIESLLEK	RPFAAIVGGSK	SCSTSVKPISRGVFAAK	LASLADLYVNDAFGTAHR	ADLNVPLDDNQNITDDTR	ADLNVPLDDNQNITDDTRK
48	gi|543176708	ATP sulfurylase 2-like protein	40123.4	0	253	11	LSPKQLR	LNILPFR	ADDVPLDVR	DFLFISGTK	DLYDPDHGKK	EADAVFAFQLR	INAGANFYIVGR	READAVFAFQLR	NPILLLHPLGGFTK	NPVHNGHALLMNDTR	VKDGSLVNMSLPIVLAIDDETK
49	gi|508777590	Monodehydroascorbate reductase 6 isoform 4	53158.5	8.8	337	5	IGGNLPGVHYIR	YGSLIIATGCTASR	LPGFHTCVGSGGER	EAYAPYERPALTK	EFVIVGGGNAAGYAAR
50	gi|460415276	Predicted: adenosyl homocysteinase-like	53686.2	5.78	355	9	SGILVLAEGR	HSLPDGLMR	DMSQADFGR	FDNLYGCR	ITIKPQTDR	LVGVSEETTTGVKR	GETLQEYWWCTER	LEIELAEVEMPGLMACR	WCSCNIFSTQDHAAAATAR
51	gi|413953335	Transketolase isoform 2	69063.4	5.46	167	4	NPYWFNR	ESVLPAAVTAR	MFGDFQKDTAEER	VVSFVSWELFDEQSDEYK
52	gi|223551247	Ferredoxin-NADP reductase, putative	40739.6	8.7	69	9	MYIQTR	EKAPENFR	KNDEGVTVNK	ISTTPERISFNK	NDEGVTVNKFKPK	RLVYTNEQGEIVK	LYSIASSALGDFGDSK	FKPKNPYVGTCLLNTK	ITGDDAPGETWHMVFSTEGEIPYR
53	gi|330254337	NAD(P)-binding Rossmann-fold-containing protein	34972.2	8.37	102	3	SEQFVARGLVR	AEQYLADSGIPYTIIR	ELLVGKDDELLETETR
54	gi|433335660	Malate dehydrogenase	36037.5	6.11	294	4	ALGQISER	LSSALSAASSACDHIR	VLVVANPANTNALILK	NGEWSIVQGLPIDEMSR
55	gi|449532425	Predicted: chloroplast stem-loop binding protein of 41 kDa, chloroplastic-like, partial	30271.3	5.26	85	2	NMHFYAEPR	DCEEWFFDR
56	gi|350538867	Arginase 2	36943	5.6	193	8	LLQVGIR	IMEGGYAR	RLLQVGIR	VVEASLTLIR	FGVEQYEMR	RFGVEQYEMR	VLTDVGDLPVQELR	DVLNILHNLQGDIVGADVVEYNPQR
57	gi|449450436	Predicted: glutamate-glyoxylate aminotransferase 2-like	52897.7	5.62	260	8	GELYLR	EGVFHLR	EVAEFIER	KEVAEFIER	ARIMTDGFNSCK	KFNDEFMEQYA	HYLSMIGGGLGAYSDSR	AMVIINPGNPTGQCLSEANLR
58	gi|384582593	Maturase K, partial (chloroplast)	18022.3	9.64	66	5	DPFIHYVR	NTPLLMNKWK	FCNVLGHPISK	SQMLENSFLIENGMKK	WKYYLIHLWQCHFYVWSQPGK
59	gi|502142675	Predicted: uncharacterized protein LOC101509967 Isoform X1	10306.8	4.92	62	5	NSGELLK	MESGKFDPR	QNEVLMEAYR	LQVEEEMLMR	SMLHEMQKLQVEEEMLMR
60	gi|330255786	Glutathione S-transferase phi 8	29270.2	0	83	3	VLDVYEAR	LPLFLSPPSIK	DLQFELIPVDMR
61	gi|530684266	Fructose-bisphosphate aldolase	42207.6	6.38	345	8	EAAWGLAR	AAQDALLLR	AKANSLAQLGK	LASIGLENTEANR	TVVSIPNGPSELAVK	RLASIGLENTEANR	GILAMDESNATCGKR	GLVPLAGSNNESWCQGLDGLASR
62	gi|475577109	Malate dehydrogenase 1, mitochondrial	34931.2	5.26	96	2	LFGVTTLDVVR	HCPNALVNMISNPVNSTVPIAAEVFKK
63	gi|527197786	Cytochrome b6-f complex iron-sulfur subunit 1, chloroplastic, partial	24248.1	8.48	109	4	SMATSIPADDR	NHGPGDRTLTQGLK	VVFVPWLETDFR	FICPCHGSQYNNQGR
64	gi|330318806	Photosystem I reaction center subunit iv b	11369.2	9.88	67	4	YPVVVR	ESYWFK	TRYPVVVR	ESYWFKGIGSVVAVDQDPK
65	gi|332645863	Triosephosphate isomerase	27380.1	5.39	151	4	FFVGGNWK	IIYGGSVNGGNCK	AILNESSEFVGDK	RAILNESSEFVGDK
66	gi|399139488	Ribulose-1,5-bisphosphate carboxylase/oxygenase large subunit, partial	51658.9	6.19	435	14	NHGMHFR	AMHAVIDR	ACYECLR	DTDILAAFR	VALEACVQAR	DLAAEGNAIIR	QKNHGMHFR	DNGLLLHIHR	DITLGFVDLLR	LTYYTPEYETK	DDENVNSQPFMR	TFQGPPHGIQVER	DITLGFVDLLRDDFVEK	ELGVPIIMHDYLTGGFTANTSLAHYCR
67	gi|527203530	Actin-97	41947.1	5.37	437	12	VVAPPER	AGFAGDDAPR	GYSFTTSAER	HTGVMVGMGQK	AVFPSIVGRPR	AEYDESGPSIVHR	IWHHTFYNELR	NYELPDGQVITIGAER	YPIEHGIVSNWDDMEK	VAPEEHPILLTEAPLNPK	DLYGNIVLSGGTTMFPGIADR	TTGIVLDSGDGVSHTVPIYEGYALPHAILR

## Sheet: A. mollis roots
No.	Accession (gb)	Protein Name	Theoretical (Mr)	Theoretical (pI)	Score	MP	Sequence
R1	gi|460411270	Predicted: 60S acidic ribosomal protein P2B-like isofoR1	11411.9	4.55	86	1	ILASVGAEADDDRIELLLSQVK
R2	gi|511774224	2-Cys peroxiredoxin, partial	25600.3	8.51	77	5	SVDETLR	VKLSEYIGK	ASSEVPLVGNK	EGVIQHSTINNLAIGR	SGGLGDLNYPLISDVTK
R3	gi|223547542	NADH dehydrogenase, putative	19142.8	4.76	77	1	HVPLHRPGPLPEEFYK
R4	gi|297333574	GF14 omega	29372.6	4.7	112	4	MAVSAR	DSTLIMQLLR	DAAEHTLSAYK	LGLALNFSVFYYEILNSPDR
R5	gi|300256770	Hypothetical protein VOLCADRAFT_119802	87208.3	5.31	61	9	LVRIVDR	VWVAPPYLR	DYLGNLTRLVR	SYEVYSSTHLR	MAKTMTEWYVR	LHRHISVLADMR	LADITAEYESRHR	GISSSCCAAASLESIIWIDR	GISSSCCAAASLESIIWIDRK
R6	gi|514802368	PREDICTED: endochitinase A-like	30180.1	8.55	83	1	GPLQISWNYNYGPAGR
R7	gi|223539983	Alpha-galactosidase/alpha-n-acetylgalactosaminidase, putative	40064.6	5.19	125	6	YPPMR	APLLIGCDVR	YDNCFNLGIKPKER	VQASGTDGCLQVWAGPLSGHR	KVQASGTDGCLQVWAGPLSGHR
R8	gi|460377572	Predicted: 14-3-3-like protein-like	29218.6	4.69	84	6	LAEQAER	DSTLIMQLLR	YEEMVEFMEK	GDYHRYLAEFK	VAKVDVEELTVEER	SAQDIALAELAPTHPIR
R9	gi|226498758	Inositol-tetrakisphosphate 1-kinase 3	37721	8.59	63	8	VRAR	VRVPK	LRGLAR	EHGTRDR	EVVVGYALTTK	LFNIDMIREHGTR	QLFINTDPSSIPAAVRR	DRFYVIDMNYFPGYGK
R10	gi|514802088	Predicted: beta-glucosidase 12-like	51939.5	6.73	61	12	IIDR	IEYHHK	SYNTDSR	CNDNAVR	YPKNSAHWFK	LMKDMGMDAYR	HLLALHSAIRDGANVK	DMGMDAYRFSISWTR	RALDFTFGWFMDPLVK	GKIGISLVSLWFLPSSPSK	FSISWTRILPNGSMSGGVDR	VKHWITFNEPGGFCSGGYASGVLAPGR
R11	gi|432140649	Heat shock protein 70	74288.5	5.26	475	16	IAGLEVLR	LDGIPPAPR	RPVENSLR	NGPLRVVAEK	FEELCSDLLDR	QFAAEEISAQVLR	AVVTVPAYFNDSQR	QAVVNPENTFFSVK	SLGSFRLDGIPPAPR	QFAAEEISAQVLRK	FEELCSDLLDRLK	QVSYTVVRDENGNVK	QAVVNPENTFFSVKR	QDITITGASTLPSDEVER	KQDITITGASTLPSDEVER	SEVFSTAADGQTSVEINVLQGER
R12	gi|413942896	Profilin-4	14206	4.63	71	2	YMVIQGEPGVVIR	DFDEPGTLAPTGLFVGGTK
R13	gi|430763366	Polyubiquitin 14, partial	15572.3	5.74	68	2	LRGGL	EGIPPDQQR
R14	gi|502126081	Predicted: proteasome subunit alpha type-1-B-like	31594.6	4.94	100	5	QGSAAIGLR	VLSRYMR	VDDHIGVAIAGLTADGR	NQYDTDVTTWSPAGR	SECINYNYTYESPLPVGR
R15	gi|514761174	Predicted: 26S protease regulatory subunit 6A homolog	47990.7	4.94	308	14	ILQIHSR	LLDNEIR	ADILDPALMR	GVLLYGPPGTGK	RFDSEVSGDR	ASRLLDNEIR	IEFPHPSEEAR	KIEFPHPSEEAR	AVCVEAGMLALRR	QTIFLPVVGLVDPDK	MNVNPDVNFEELAR	LAGPQLVQMFIGDGAK	KMNVNPDVNFEELAR	DSYLILDTLPSEYDSR
R16	gi|15242097	Putative villin	108443	5.25	60	17	LNIR	MTFSMR	ALEVVQYIK	SGMHGDSFQR	EAYLTSVEFK	DLDQALQGAGQK	SATEAAEEFFR	MLDLIKPNEPTK	MVESMKFVPAQAR	ASAISLANKMVESMK	SNLVSVMEGYETVMFR	ALEVVQYIKDTYHDGK	AQKEGSESEQFWELLGGK	STSETNEEEAMSSINEDSK	SNLVSVMEGYETVMFRSK	MMADAEAGEFWGLFGGFAPLPK	EPIQFFVIMQSFITFKGGVSDAFK
R17	gi|440573478	Tau class glutathione S-transferase	27796.3	7.62	63	8	LLGGR	SNPVHKK	SSPFMLR	ETCAEQVQVK	MPLLSAWMDR	AAEEMVANFLIPEEALR	LLPCIQAVFSGQGEQYQK	QTMNHTSELLLKSNPVHK
R18	gi|543177187	RuBisCO large subunit-binding protein subunit alpha, belongs to the chaperonin family	61281.2	0	147	4	LTVEFENAR	VGGATETELEDR	MASTNALSSASILR	AIELPDAMENAGAALIR
R19	gi|508787331	Ferritin 4	30435.4	6.56	116	8	LSEYVSQLR	KLSEYVSQLR	LSEYVSQLRR	ELLLVPTVPQASLAR	GDALYAMELALSLEK	YSNGLIHAVKYPQR	NGGVGGVILASKEANNR	VQLQSMLMPLSEFDHAEK
R20	gi|355479515	Adenosine kinase	38081.9	5.08	103	6	DKFGEEMTK	FGEEMTKNSK	QPENWALVEK	AGCYAANVIIQR	SLIANLSAANCYK	VHGWETENVEEIALK
R21	gi|508715249	Ran-binding protein 1 b isoform 1	25211.3	4.7	79	2	LYRFDK	EEMFCIR
R22	gi|113622845	Os08g0120000	31839.9	8.81	62	5	GLNPAK	WIQDSR	DAPPQPGK	LVASKPHSSSPAPPPPPSK	SCREGICGSCAMNIDGDNGLACLTK
R23	gi|334184654	Heat shock protein 60-2	61781.3	6.08	202	11	FGVEAR	APGFGENR	APGFGENRK	AGIIDPLKVIR	IGVQIIQNALK	SVAAGMNAMDLR	QAIGERCEQIR	GRNVIIEQSWGAPK	AMETVGKEGVITIQDGK	MISTSEEIAQVGTISANGDR	QVANATNDVAGDGTTCA
R24	gi|413956514	Glutamine synthetase3	18226.2	6.92	79	6	WGVANR	EGKGYFEDR	WGVANRGASIR	EHIAAYGEGNER	EHIAAYGEGNERR	HREHIAAYGEGNER
R25	gi|330252829	20S proteasome alpha subunit G1	27644.9	5.93	62	10	LIASK	YFGAAIGK	RIHSVHR	TALEEMDAD	YFGAAIGKGK	AVDNSGTVVGIK	IIYKLHDEAK	CKDGIVMGVEK	AFELEMSWICEESKR	VFQIEYAAKAVDNSGTVVGIK
R26	gi|470124373	Predicted: beta-galactosidase 13-like	87359.9	8.91	63	9	EVPDLIFR	TSAIFTTTR	TLAIQVKCS	YVTMIVNKLK	QNVGVPWIMCK	WMESPEPIPSTK	GHYNFSGNYDLVR	MTGMGKGMIWVNGESIGR	EIPINNRTPLELYGLLK
R27	gi|508778822	Tetratricopeptide repeat (TPR)-like superfamily protein, putative	64560.6	8.7	61	14	LAFLAFK	TLLFTSR	VNLWKGNK	LMALLSLAR	EYYDEMR	DGNLFDSLR	LMALLSLARR	AIQTFHTMEK	DLFRSSMDTR	FRMTPDEEAFR	DTFLLVLGKFFK	ENCLNEAQNILK	AIQTFHTMEKFR	CGNTGENTYELMIWVLGNHRK
R28	gi|470107271	Predicted: succinyl-CoA ligase [ADP-forming] subunit beta, mitochondrial-like	45389.9	5.87	93	4	LNFDDNAAFR	KSAGPLIIACAK	EIFALRDPTQEDPR	LSLVNEMYFAITLDR
R29	gi|355429958	Putative S-adenosyl-L-homocysteinase	61872.1	5.69	75	8	SGIIVLAEGR	HSLPDGLMR	SQSAGNCFR	FDNLYGCR	DIIMVDDMR	LVGVSEETTTGVKR	GETLQEYWWCTER	DQADYISVPVEGPYKPAQYR
R30	gi|350538295	Enolase	48053.5	5.68	301	8	QIFDSR	YNQLLR	ARQIFDSR	AAVPSGASTGIYEALELR	LVLPVPAFNVINGGSHAGNK	KLVLPVPAFNVINGGSHAGNK	YGQDATNVGDEGGFAPNIQENK	KYGQDATNVGDEGGFAPNIQENK
R31	gi|508786508	Cell division control 6 isoform 7	47047.2	8.95	66	14	SPRR	NWNPR	ESPVSTPMK	KVAAASGDMR	VAAASGDMRK	PAIADRNSSSFK	NSSSFKEIVAAIK	AGSLYACGCPGTGK	NWNPRDVEHMR	LQSLNCKPMVVTFR	MMLIIADELDYLITK	FLPRLQSLNCKPMVVTFR	EALHVSTAPSTIVCREDEQK	TMGSTSPLQHLQKLYSNNQAR
R32	gi|223549247	ATP-dependent RNA helicase, putative	78241.1	8.86	62	16	AAIIK	LYPER	AQALQR	MPSMAEK	EKSEESR	KMELNNEK	CFRLYPER	LEDSTKPEIK	ENFINGRSLR	LSDPVGHQMAR	LVQEKLQQLPEAK	SHDILIIVGETGSGK	GMESLVVVPTSKAQALQR	SYDPVKGMESLVVVPTSK	TTQLPQFLLNAGFCRDGK	SLEHLFLLGALTDECKLSDPVGHQMAR
R33	gi|527194033	S-formylglutathione hydrolase, partial	24926.2	6.22	69	2	ENFPQLDTSR	ELPALLKENFPQLDTSR
R34	gi|186510546	Ankyrin repeat family protein	87560.7	6.52	67	11	YFPR	SQFISYAK	ILEEDHHK	TFVTWLPLYLR	FIQEAHDSKTFK	NIEGNTVLQCSLK	GAGYPLSSFKADFR	ALSVPPDFKFIQEAHDSK	TFVTWLPLYLRDTSANWK	ADFRAVFGMDLDHTSLDFPK	NRGNLSFDFTEMFDSYSLYPTGK
R35	gi|550346968	UDP-glucose 4-epimerase family protein	38439.4	5.66	108	7	DQWNWASK	LFIEEICR	FDAVIHFAGLK	RPGDAETVYAATEK	GIPNNLMPYVQQVAVGR	DYIHVVDLADGHIAALR	YFNPVGAHPSGYIGEDPR
R36	gi|223525768	Alcohol dehydrogenase, putative	41875.1	5.98	106	4	GTFFGNYKPR	SEESNMCSLLR	TLKGTFFGNYKPR	KPVQEVIAEMTDGGVDR
R37	gi|475610756	Succinate dehydrogenase (ubiquinone) flavoprotein subunit, mitochondrial	81403.1	6.24	98	5	IMQNNAAVFR	LGANSLLDIVVFGR	AVIELENYGLPFSR	LNTQRIMQNNAAVFR	DDTPIKDPEWSESDPLPAMPK
R38	gi|502137510	Predicted: 60S ribosomal export protein NMD3-like	59494.1	6.07	71	14	HGAAAR	NMNVNRVK	LKSLPMEVDDR	SHGNSFLEFIGK	YGFLDADQYWR	YTFSVEISPICR	VTNSIALLDPLTLK	VSDFGNNDTIFFVR	QMDHGIDFYFTKR	VQANPDQWVAAVQLR	IKQMDHGIDFYFTK	SNNYNYKYTFSVEISPICR	MAQEAGMFTVHQTIGSVLCCK	CGIPMQPNAANMCVK
R39	gi|390098824	Triosephosphate isomerase cytosolic isoform-like	27305.2	5.72	207	6	FFVGGNWK	VAYALSQGLK	VATPAQAQEVHAELR	VATPAQAQEVHAELRK	ALLGESNEFVGDK	KGGAFTGEVSAEMLVNLSIPWVILGHSER
R40	gi|11467928	Cytochrome b	45517.1	9.85	61	3	LAGVR	LSLVHLR	DVPNGWLLRYLHANGR
R41	gi|162688983	Predicted protein	38608.4	8.27	63	8	MEMANVR	MEMANVR	LFGVTTLDVVR	DDLFNINAGIVR	RLFGVTTLDVVR	GAGSATLSMAYAAAKFAESCLR
R42	gi|460405093	Predicted: probable aldo-keto reductase 4-like	60973.7	5.51	76	5	LLEDLSNEDFR	ELGIGIVPYSPLGR	TSDTPHMSTWHAGK	LDVNCIDLYYQHR	LTTEDMVELESIASADAVK
R43	gi|508708397	Thiamin diphosphate-binding fold (THDP-binding) superfamily protein isoform 2	36039.9	8.67	63	5	RGDYVPGLK	NGPIILEMDTYR	SVETNPKELLTFFR	YHGHSMSDPGSTYRTR	DSNFYGGHGIVGAQVPLGCGLAFAQK
R44	gi|223525768	Alcohol dehydrogenase, putative	41875.1	5.98	61	5	ECAHCK	GTFFGNYKPR	SEESNMCSLLR	TLKGTFFGNYKPR	KPVQEVIAEMTDGGVDR
R45	gi|407369264	Alcohol dehydrogenase, partial	20736.5	6.08	76	1	GSTVAVFGLGAVGLGAAEGAR
